# Supplementary material
Source: PubMed Central journal article supplement (PMC3253527)
Supplement: NIHMS337699-supplement-02.pdf [file NIHMS337699-supplement-02.pdf]

FIGURE S1. REGIONS OF INTEREST FOR EVALUATIVE AFFECTIVE CIRCUIT

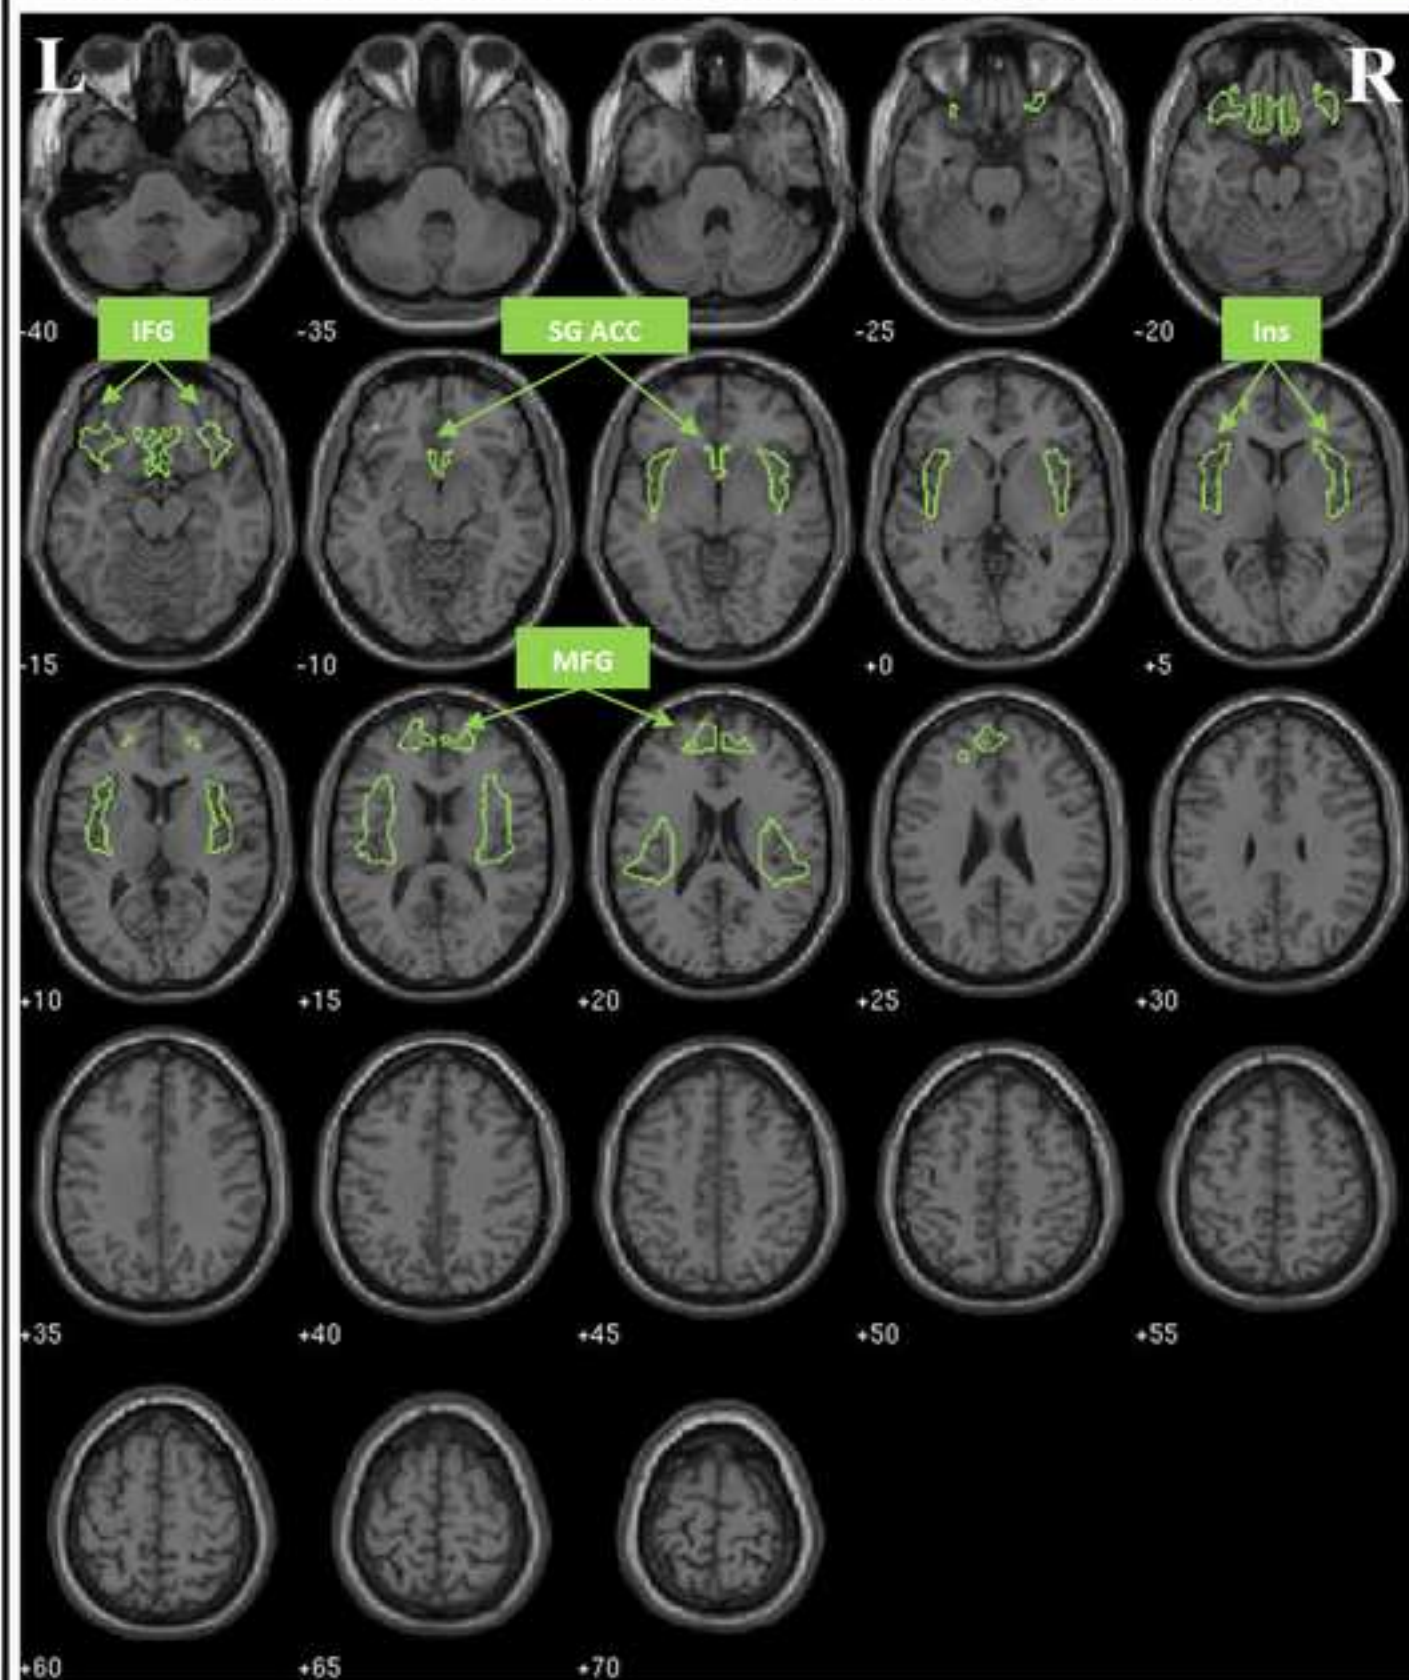

LEGEND: IFG=INFERIOR FRONTAL GYRUS; SG ACC=SUBGENUAL ANTERIOR CINGULATE CORTEX; MFG=MIDDLE FRONTAL GYRUS; INS=INSULA; L=LEFT; R=RIGHT

FIGURE S2. REGIONS OF INTEREST FOR REACTIVE AFFECTIVE CIRCUIT

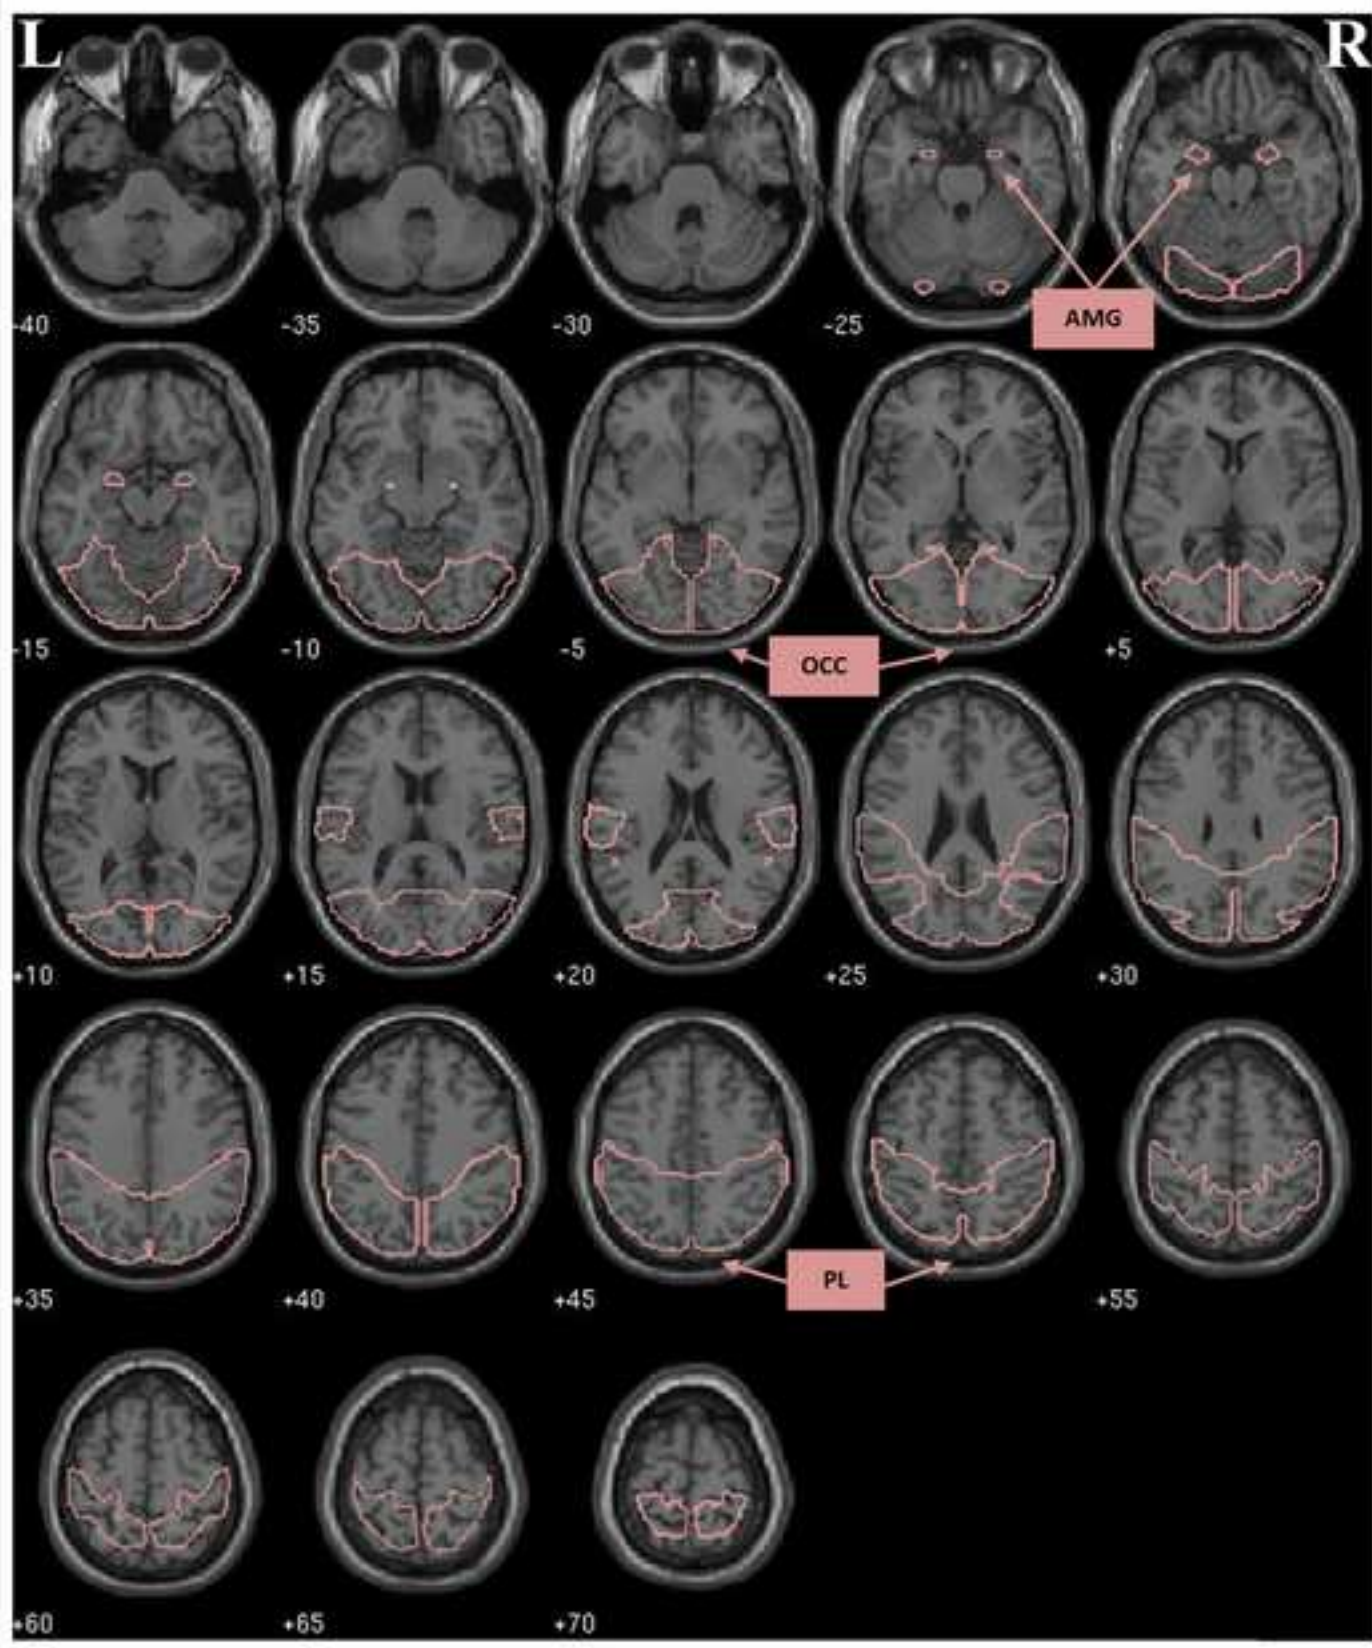

LEGEND: AMG=AMYGDALA; OCC=OCCIPITAL CORTEX; PL=PARIENTAL LOBE; L=LEFT; R=RIGHT
